# Supplementary material for: RAI14 Promotes Melanoma Progression by Regulating the FBXO32/c-MYC Pathway
Source: MDPI journal article supplement (doi:10.3390/ijms231912036), 2022-10-10
Supplement: s1 [file s1]

## Supplementary

Table S1. RT-PCR primers.

|           |                         |
|-----------|-------------------------|
| RAI14-F   | AGCCCAAGATACTACCGGACA   |
| RAI14-R   | CGCTGCATAATGTAAAGCTGTTT |
| FBXO32-F: | ATGAGAAGAGCGGCAGTTTC    |
| FBXO32-R: | TTCTTTTGGGCGATGCCACT    |
| c-MYC-F   | GTCAAGAGGCGAACACACAAC   |
| c-MYC-R   | TTGGACGGACAGGATGTATGC   |

Table S2.

RT-PCR primers

|                    |                            |
|--------------------|----------------------------|
| FBXO32-1-261-F     | ACAGAGACCAGACCCAACACTGCC   |
| FBXO32-1-261-R     | ACTGACTCGGTGTAATCTTTAAGGC  |
| FBXO32-237-574-F   | CCTTAAAGATTACACCGAGTCAGT   |
| FBXO32-237-574-R   | TCTGCAGTGGGAACTCCATGAGAGC  |
| FBXO32-556-956-F   | GAACAAGACAGACCAGCTCTCATG   |
| FBXO32-556-956-R   | CTGGGGCCGGCACC GCGCCCGCCGG |
| FBXO32-934-1248-F  | GGTTAGTGACAGCTAAGGGG       |
| FBXO32-934-1248-R  | TGGAAACTTGAAGCGGTGCT       |
| FBXO32-1227-1538-F | AGCACCGCTTCAAGTTTCCAC      |
| FBXO32-1227-1538-R | GGGGTGCAGGGGCCCCGCGA       |

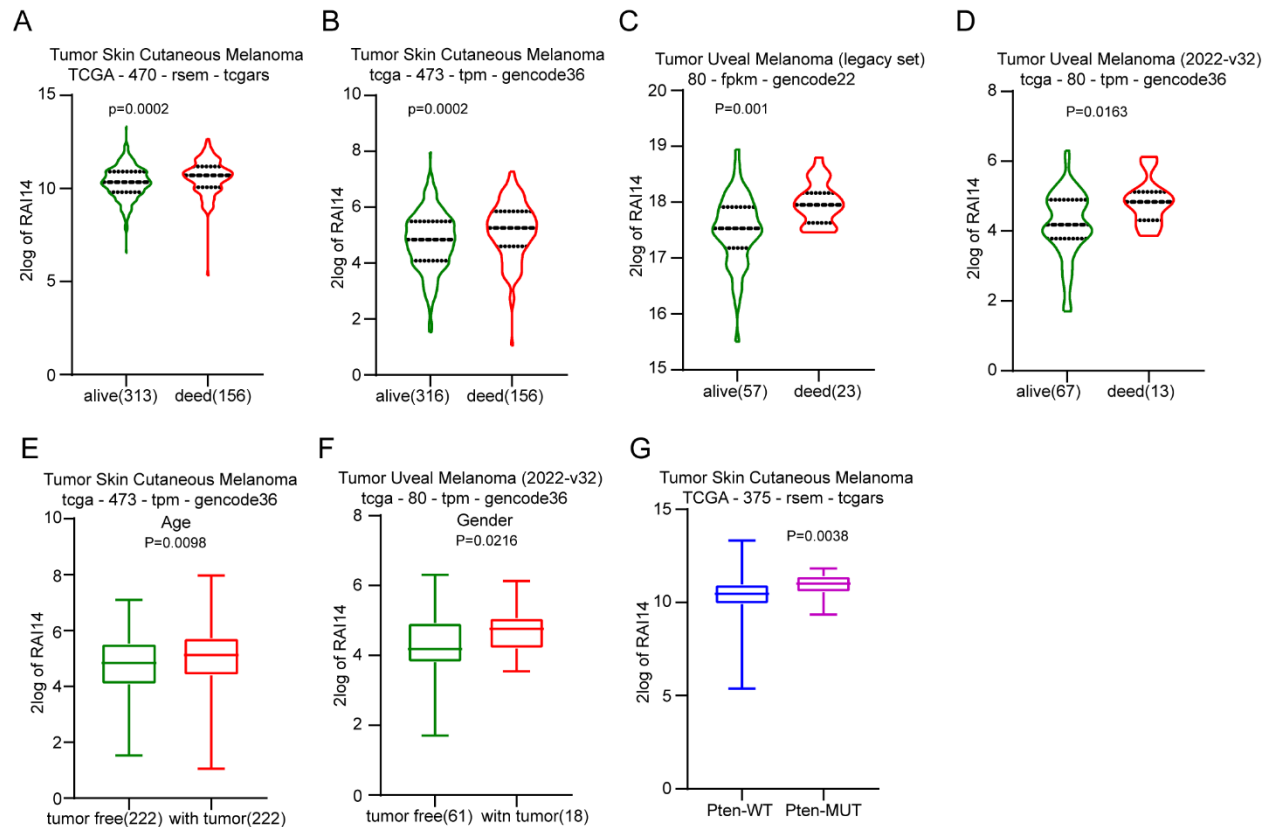

**Supplementary Figure S1 High expression of RAI14 is associated with poor prognosis of Melanoma**

**A, B, C, D** Analyses of RAI14 expression in living patients and in dead patients from four different databases. **E, F** The expression level of RAI14 in the tissues of tumor with-melanoma patients and tumor free (surgically removed) -melanoma patients. **G** The expression of RAI14 in Pten wildtype status and Pten mutation status. The data were expressed as mean  $\pm$  SD. Student's t test was performed to analyzed significance.

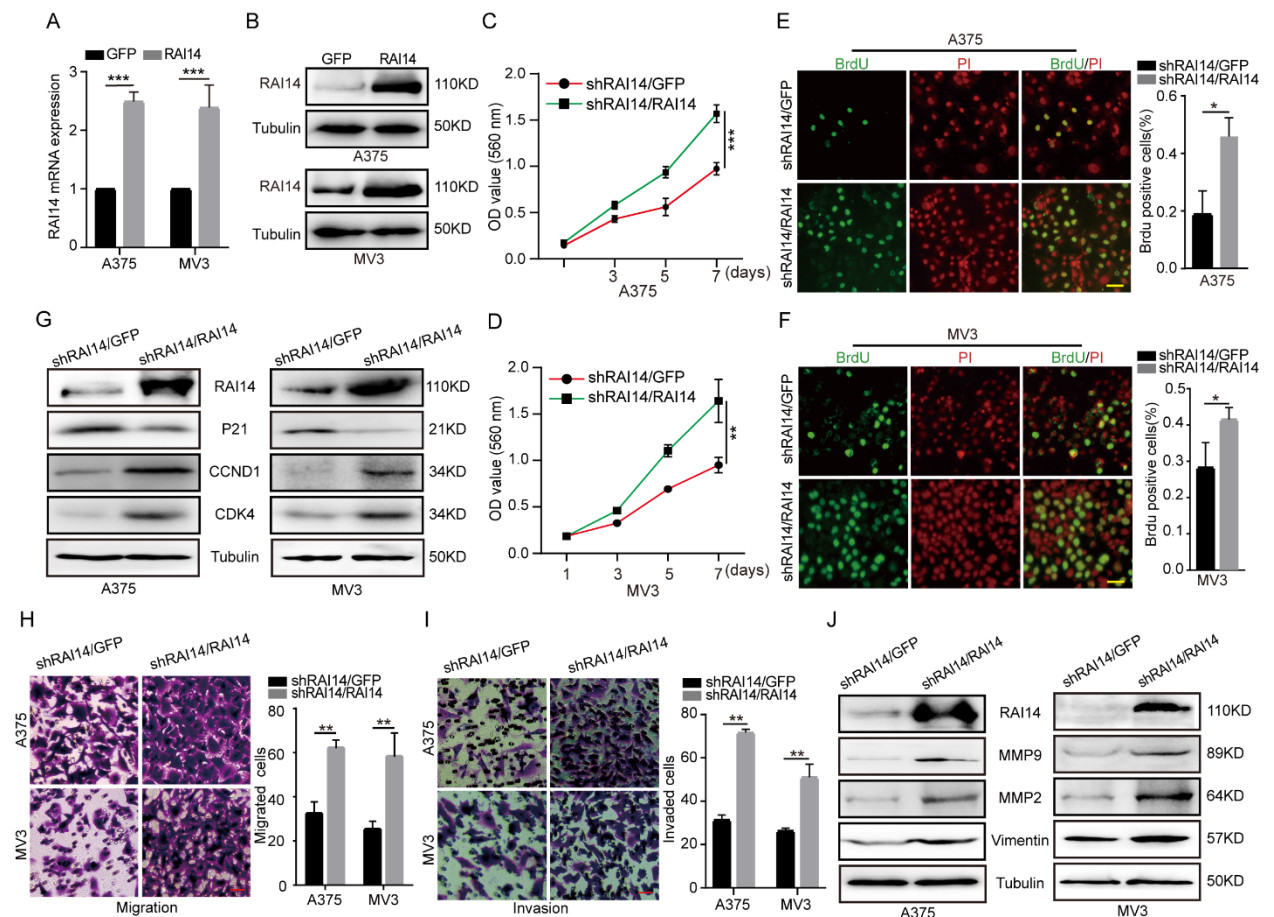

**Supplementary Figure S2 RAI14 recovery restored the cell proliferation, migration, and invasion of RAI14-knockdown Melanoma cells**

**A, B** Western Blot and qRT-PCR assay were performed to prove the recovery of RAI14. **C, D** MTT assays were performed to examine the effect of RAI14 overexpression on the cell viability and proliferation ability of RAI14-knockdown cells. **E, F** BrdU assay was used to detect the DNA synthesis ability after RAI14 restoration in RAI14 knockdown cells. **G** Western blot assay was executed to detect the expression of G1 cell cycle regulatory proteins after RAI14 restoration in RAI14 knockdown cells. Scale bar = 50  $\mu$ m. **H, I** Transwell assays were used to detect the effect of RAI14 overexpression on the migration and invasion of RAI14-knockdown and control cells. **J** Western blot assays were used to detect the effect of RAI14 overexpression on the EMT-related proteins of RAI14-knockdown and control cells. The data were expressed as mean  $\pm$  SD. Student's t test was performed to analyzed significance. \* $P < 0.05$ , \*\* $P < 0.01$ , \*\*\* $P < 0.001$ .

S3

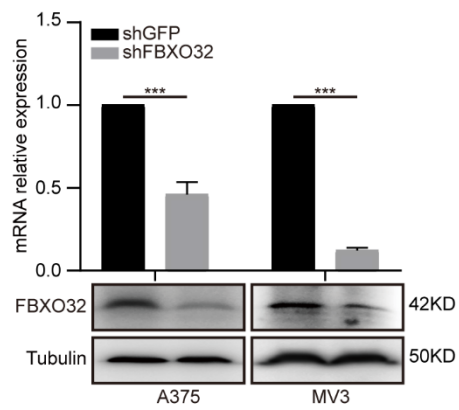

**Supplementary Figure S3** Western Blot and qRT-PCR assay were performed to detect the effect of the FBXO32 knockdown. \*\*\*  $p < 0.001$ .
